# Supplementary figures and images for: Ultra-Wideband Communication and Sensor Fusion Platform for the Purpose of Multi-Perspective Localization
Source: MDPI journal article supplement (doi:10.3390/s22186880), 2022-09-12

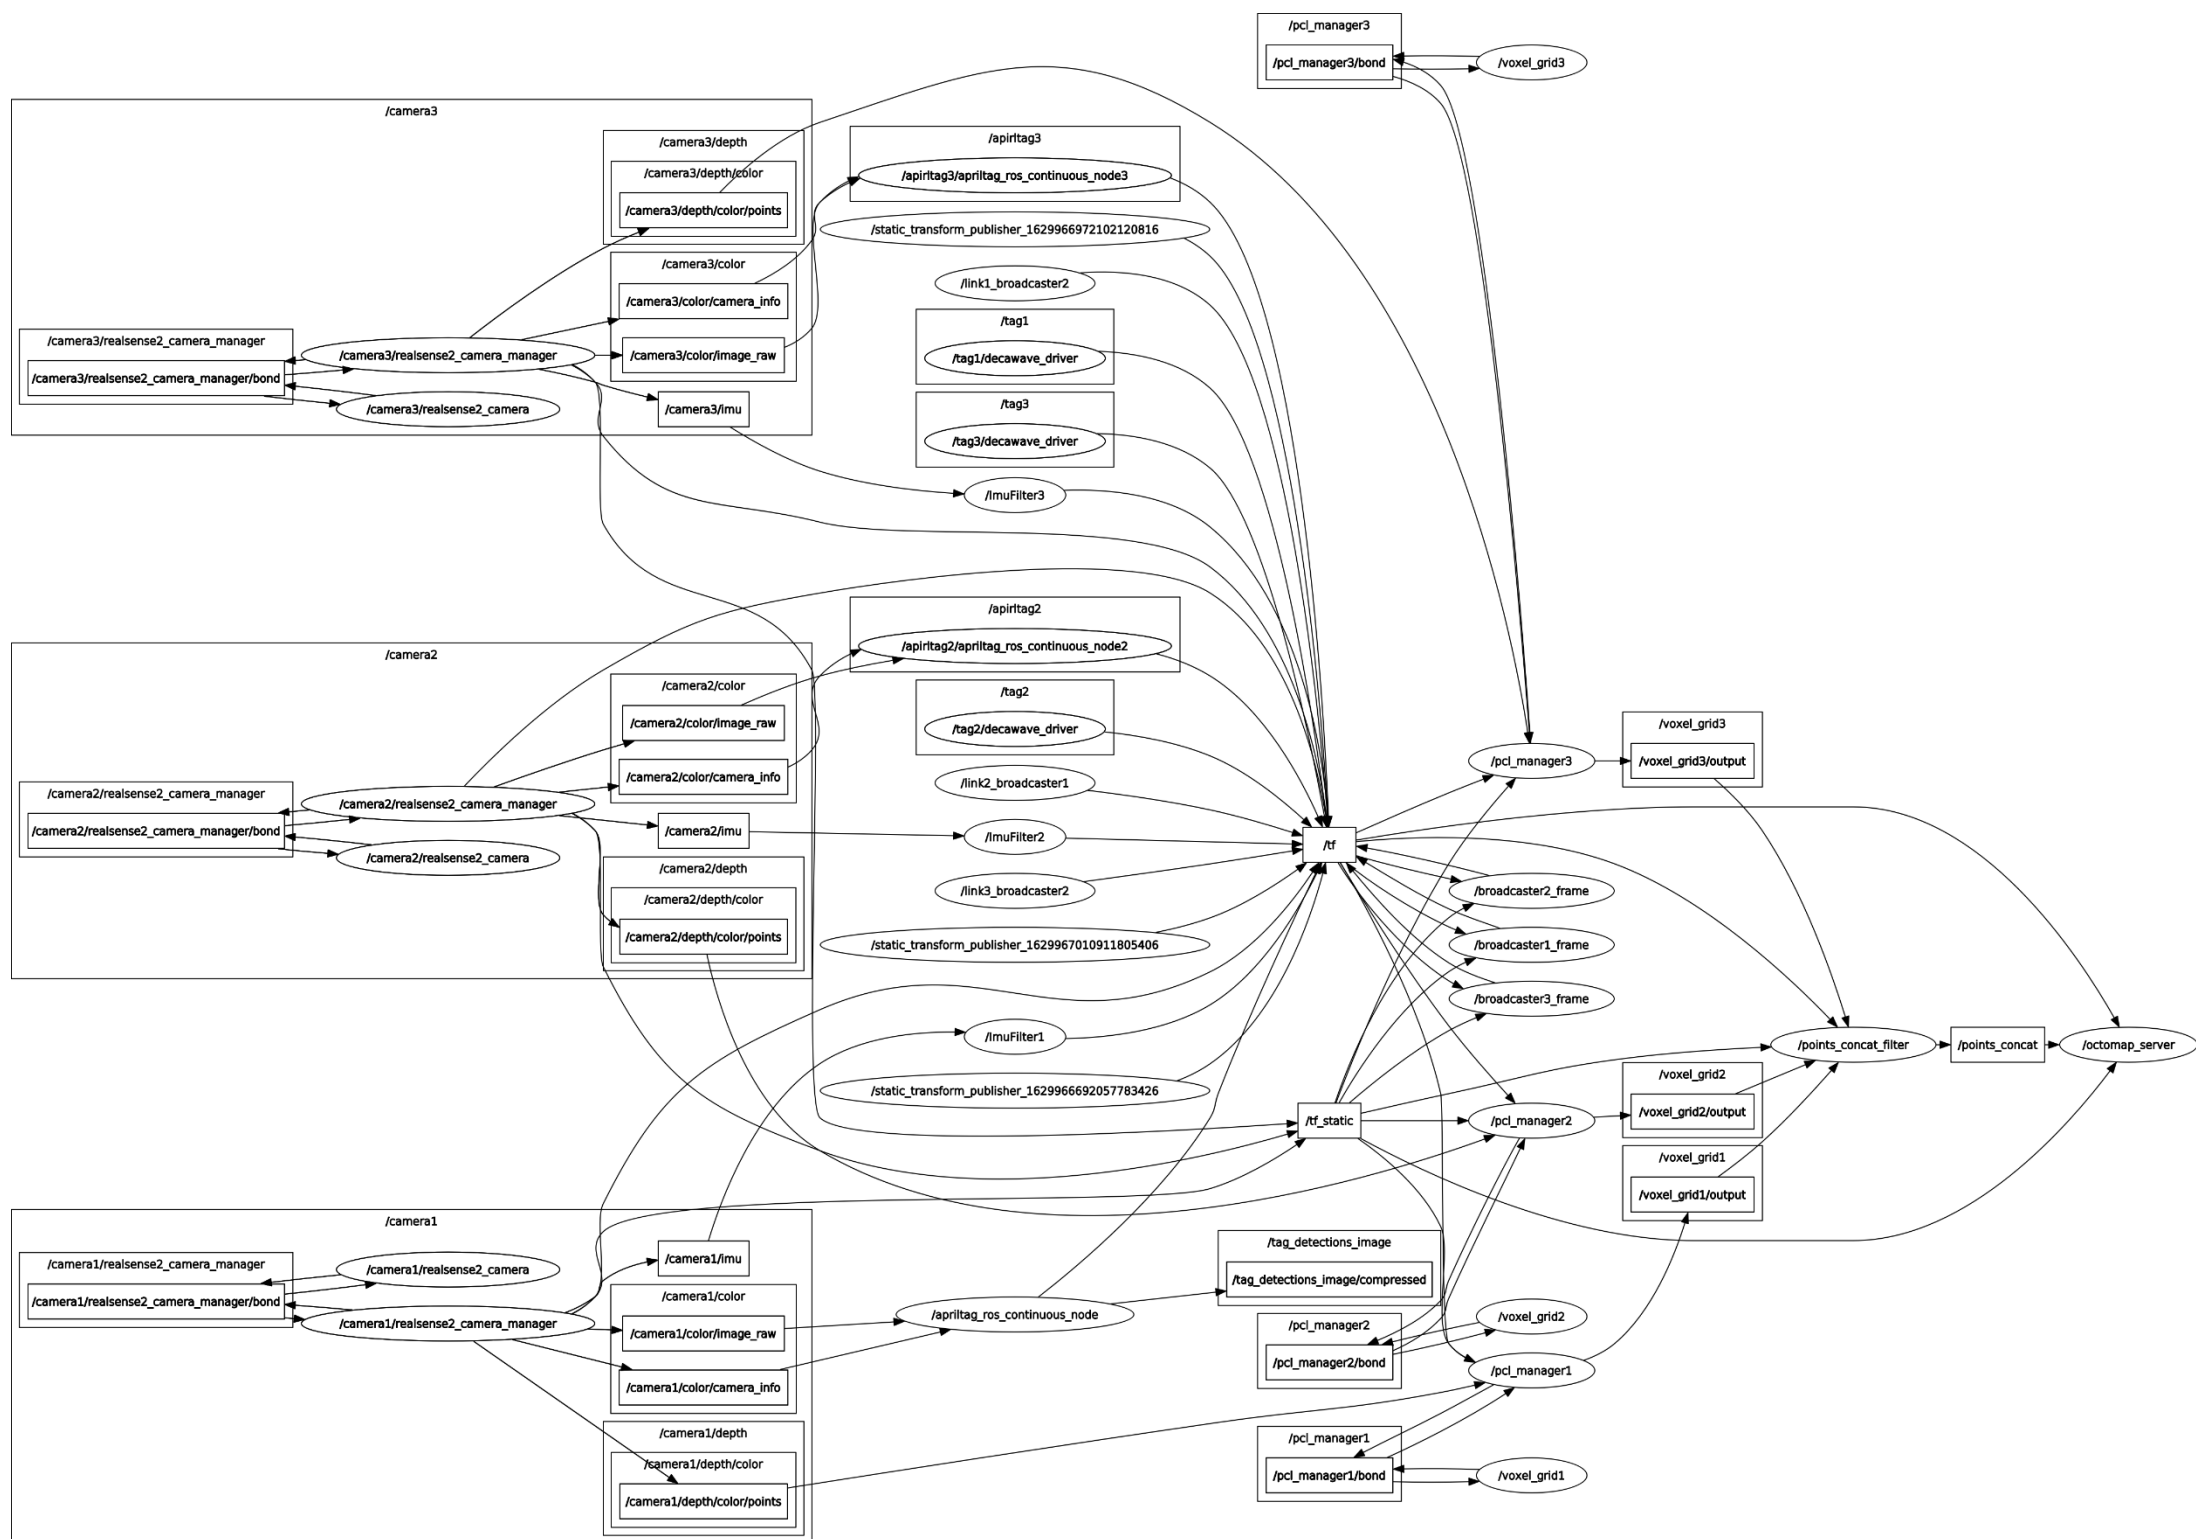

**Figure S1.** Full `rqt_graph` output of base system

Supplement: s1 [file s1]
